# Supplementary material
Source: PubMed Central journal article supplement (PMC8012006)

# Uninsurance in Adult Cancer Patients and Survivors (Age 18-64)

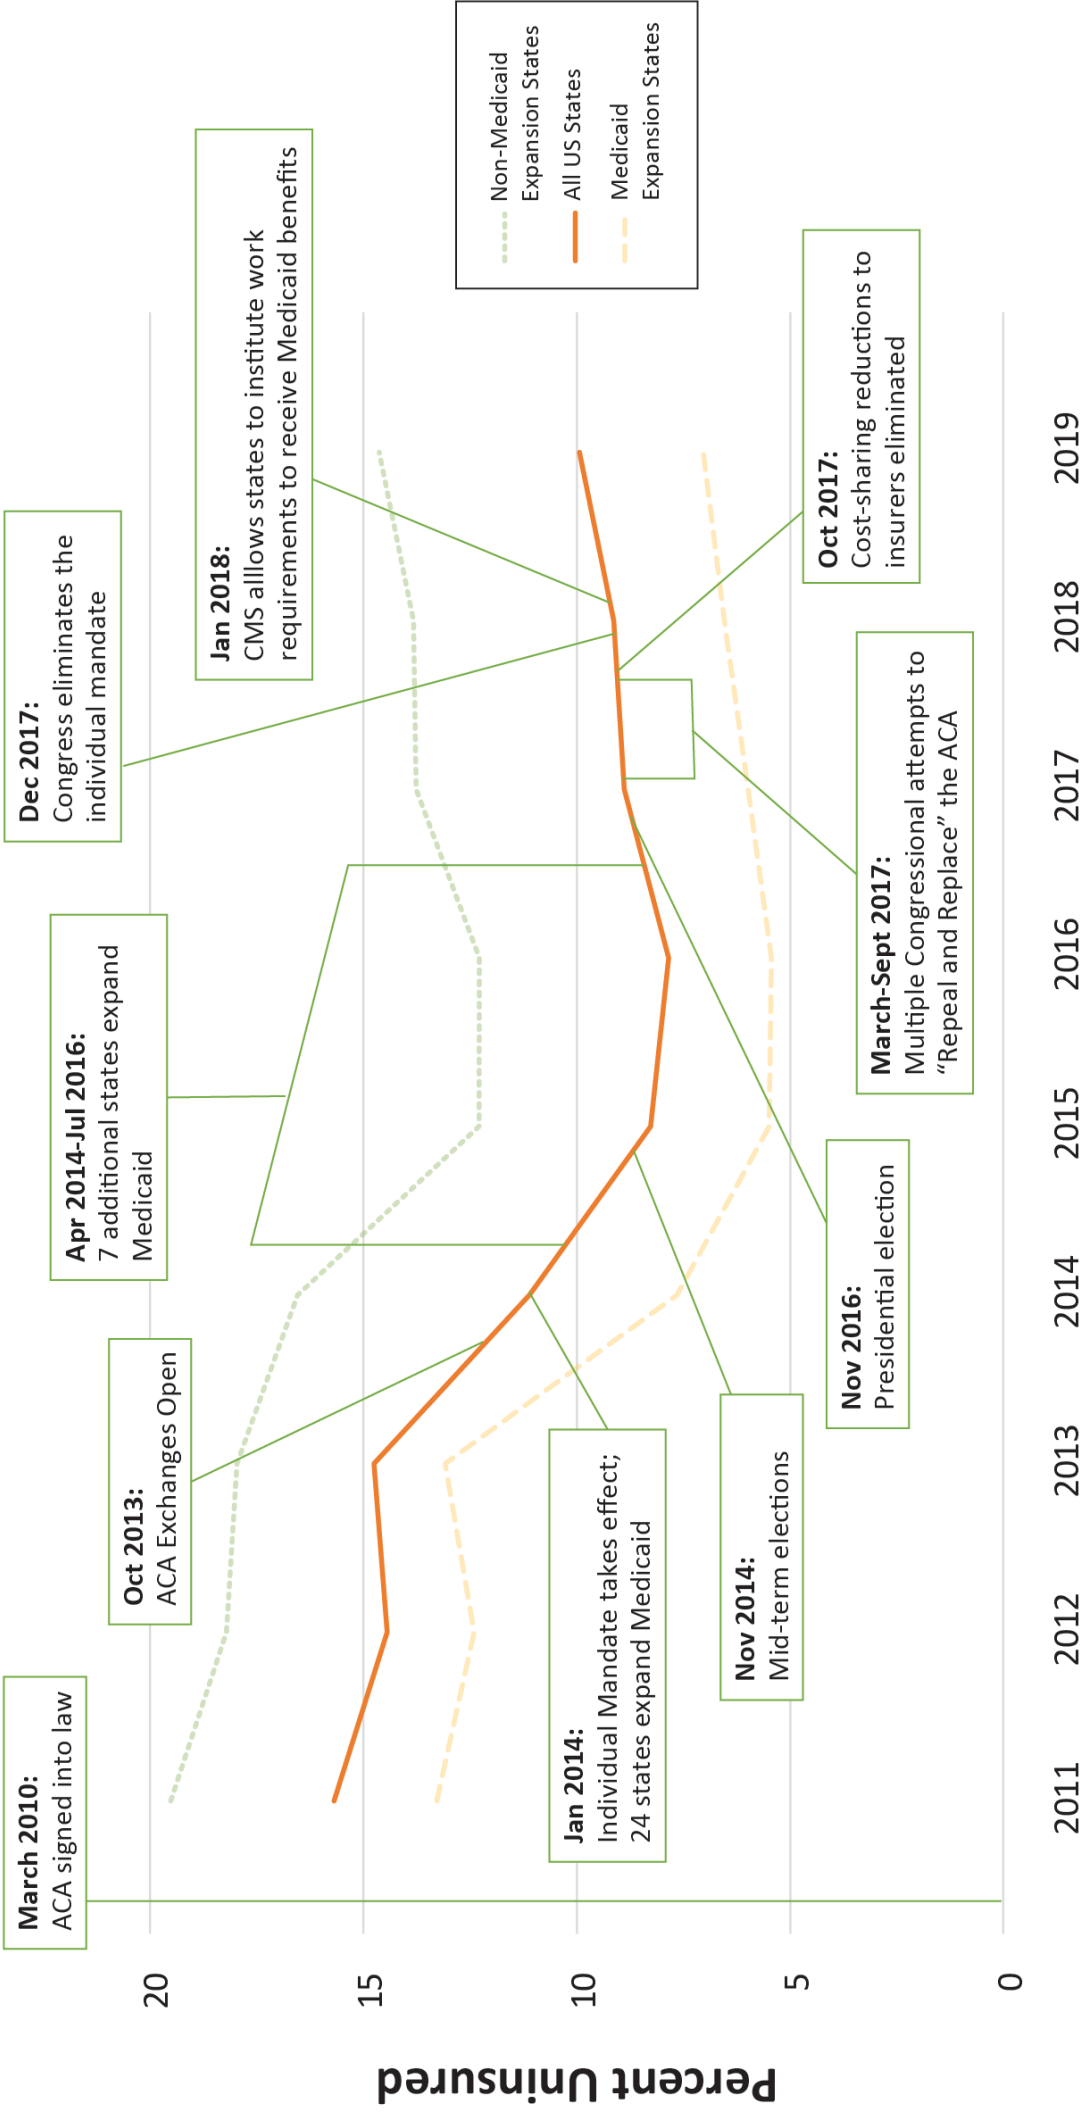

Supplement: NIHMS1678165-supplement-Figure.pdf [file NIHMS1678165-supplement-Figure.pdf]
